# Supplementary material
Source: Springer Nature journal article supplement (https://www.springermedizin.de/resource/supplementary/12889_2010_2664_MOESM3_ESM.pdf/9486966)
Supplement: MOESM3 [file 9486966]

**Table 2: CD4 cell count assessment, enrolment into care and treatment and ARV initiation during pregnancy among HIV positive women, classified according to the type of HIV services package, in Rwanda, from January through to December 2008**

|                                                                                       | Full package <sup>s</sup> | Stand-alone | RR (95% CI) <sup>#</sup> |
|---------------------------------------------------------------------------------------|---------------------------|-------------|--------------------------|
| Sites, N (%)                                                                          | 18 (56%)                  | 14 (44%)    | -                        |
| Total HIV positive pregnant women (N)                                                 | 743                       | 195         | -                        |
| CD4 cell count assessment, N (%):                                                     |                           |             |                          |
| Screened for CD4 cell counts <sup>¶</sup>                                             | 547 (74%)                 | 111 (57%)   | <b>1.3 (1.1 – 1.4)</b>   |
| Received CD4 cell count result <sup>¶¶</sup>                                          | 536 (98%)                 | 111 (100%)  | 0.97 (0.96 – 1.0)        |
| CD4 cell count < 350 cells/mm <sup>3</sup>                                            | 134 (25%)                 | 26 (23%)    | -                        |
| Enrolment into care and treatment, N (%)                                              | 495 (67%)                 | 69 (35%)    | <b>1.9 (1.5 – 2.3)</b>   |
| HAART initiation among women with CD4 cell counts < 350 cells/mm <sup>3</sup> , N (%) | 105 (78%)                 | 22 (85%)    | 0.9 (0.7 – 1.1)          |
| Received PMTCT prophylaxis or more efficacious ARV regimens:                          |                           |             |                          |
| Dual (AZT/sd-nvp) prophylaxis                                                         | 331 (62%)                 | 72 (68%)    | -                        |
| HAART for life                                                                        | 105 (20%)                 | 22 (21%)    | -                        |
| Short-course HAART                                                                    | 75 (14%)                  | 12 (11%)    | -                        |
| sd-nvp <i>only</i>                                                                    | 21 (4%)                   | 0 (0%)      | -                        |
